# Supplementary material for: Ancient clays support contemporary biogeochemical activity in the Critical Zone
Source: Copernicus journal article supplement (doi:10.5194/bg-22-3357-2025), 2025-07-10
Supplement: Supplementary file 1 [file bg-22-3357-2025-supplement.pdf]

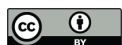

*Supplement of*

## **Ancient clays support contemporary biogeochemical activity in the Critical Zone**

**Vanessa M. Alfonso et al.**

*Correspondence to:* Vanessa M. Alfonso ([vanessa.alfonso23@bcmail.cuny.edu](mailto:vanessa.alfonso23@bcmail.cuny.edu))

The copyright of individual parts of the supplement might differ from the article licence.

|                                               | C/N<br>Ratio | N<br>mg/kg | C<br>mg/kg | Microbi<br>al<br>Biomass | Respirati<br>on | Exchangeabl<br>e NO <sub>3</sub> <sup>-</sup> | Exchangeabl<br>e NH <sub>4</sub> <sup>+</sup> | TIN    | Microbial<br>Biomass<br>N | Potential net<br>N<br>Mineralizatio | Potential<br>net<br>Nitrificati | Denitrificati<br>on<br>Potential | ±<br>OM |
|-----------------------------------------------|--------------|------------|------------|--------------------------|-----------------|-----------------------------------------------|-----------------------------------------------|--------|---------------------------|-------------------------------------|---------------------------------|----------------------------------|---------|
| C/N Ratio                                     | 1            | 0.351      | .860**     | 0.310                    | 0.362           | 0.300                                         | .389*                                         | .482** | .548**                    | .626**                              | .439*                           | .381*                            | .464*   |
|                                               |              | 0.067      | 0.000      | 0.108                    | 0.058           | 0.120                                         | 0.041                                         | 0.003  | 0.003                     | 0.000                               | 0.019                           | 0.045                            | 0.013   |
|                                               | 28           | 28         | 28         | 28                       | 28              | 28                                            | 28                                            | 28     | 28                        | 28                                  | 28                              | 28                               | 28      |
| N mg/kg                                       |              | 1          | .633**     | .339*                    | .333*           | .550**                                        | .528**                                        | .668** | .645**                    | .456*                               | 0.127                           | 0.065                            | .714**  |
|                                               |              |            | 0.000      | 0.035                    | 0.033           | 0.002                                         | 0.004                                         | 0.000  | 0.000                     | 0.015                               | 0.521                           | 0.742                            | 0.000   |
|                                               |              |            | 28         | 28                       | 28              | 28                                            | 28                                            | 28     | 28                        | 28                                  | 28                              | 28                               | 28      |
| C mg/kg                                       |              |            | 1          | .503**                   | 0.369           | 0.360                                         | .559**                                        | .645** | .635**                    | .635**                              | .435*                           | 0.293                            | .725**  |
|                                               |              |            |            | 0.006                    | 0.053           | 0.060                                         | 0.002                                         | 0.000  | 0.000                     | 0.000                               | 0.021                           | 0.130                            | 0.000   |
|                                               |              |            |            | 28                       | 28              | 28                                            | 28                                            | 28     | 28                        | 28                                  | 28                              | 28                               | 28      |
| Microbial<br>Biomass C                        |              |            |            | 1                        | .645**          | -0.034                                        | 0.067                                         | 0.115  | 0.131                     | 0.238                               | 0.211                           | -0.016                           | .424*   |
|                                               |              |            |            |                          | 0.000           | 0.636                                         | 0.736                                         | 0.558  | 0.507                     | 0.224                               | 0.281                           | 0.936                            | 0.025   |
|                                               |              |            |            |                          | 28              | 28                                            | 28                                            | 28     | 28                        | 28                                  | 28                              | 28                               | 28      |
| Respiration                                   |              |            |            |                          | 1               | 0.013                                         | 0.144                                         | 0.233  | 0.278                     | 0.303                               | 0.137                           | 0.118                            | .400*   |
|                                               |              |            |            |                          |                 | 0.947                                         | 0.465                                         | 0.234  | 0.153                     | 0.117                               | 0.488                           | 0.551                            | 0.035   |
|                                               |              |            |            |                          |                 | 28                                            | 28                                            | 28     | 28                        | 28                                  | 28                              | 28                               | 28      |
| Exchangeabl<br>e NO <sub>3</sub> <sup>-</sup> |              |            |            |                          |                 | 1                                             | 0.306                                         | .504** | .471*                     | .446*                               | 0.130                           | 0.348                            | 0.218   |
|                                               |              |            |            |                          |                 |                                               | 0.113                                         | 0.006  | 0.011                     | 0.017                               | 0.511                           | 0.063                            | 0.264   |
|                                               |              |            |            |                          |                 |                                               | 28                                            | 28     | 28                        | 28                                  | 28                              | 28                               | 28      |
| Exchangeabl<br>e NH <sub>4</sub> <sup>+</sup> |              |            |            |                          |                 |                                               | 1                                             | .343** | .768**                    | .430*                               | 0.281                           | -0.089                           | .627**  |
|                                               |              |            |            |                          |                 |                                               |                                               | 0.000  | 0.000                     | 0.022                               | 0.147                           | 0.654                            | 0.000   |
|                                               |              |            |            |                          |                 |                                               |                                               | 28     | 28                        | 28                                  | 28                              | 28                               | 28      |
| TIN                                           |              |            |            |                          |                 |                                               |                                               | 1      | .870**                    | .571**                              | 0.367                           | 0.016                            | .638**  |
|                                               |              |            |            |                          |                 |                                               |                                               |        | 0.000                     | 0.002                               | 0.055                           | 0.934                            | 0.000   |
|                                               |              |            |            |                          |                 |                                               |                                               |        | 28                        | 28                                  | 28                              | 28                               | 28      |
| Microbial<br>Biomass N                        |              |            |            |                          |                 |                                               |                                               |        | 1                         | .746**                              | .462*                           | 0.004                            | .723**  |
|                                               |              |            |            |                          |                 |                                               |                                               |        |                           | 0.000                               | 0.013                           | 0.982                            | 0.000   |
|                                               |              |            |            |                          |                 |                                               |                                               |        |                           | 28                                  | 28                              | 28                               | 28      |
| Potential<br>Net N<br>Mineralizati            |              |            |            |                          |                 |                                               |                                               |        |                           | 1                                   | .532**                          | 0.135                            | .438**  |
|                                               |              |            |            |                          |                 |                                               |                                               |        |                           |                                     | 0.001                           | 0.435                            | 0.007   |
|                                               |              |            |            |                          |                 |                                               |                                               |        |                           |                                     | 28                              | 28                               | 28      |
| Potential net<br>Nitrification                |              |            |            |                          |                 |                                               |                                               |        |                           |                                     | 1                               | 0.135                            | .377*   |
|                                               |              |            |            |                          |                 |                                               |                                               |        |                           |                                     |                                 | 0.432                            | 0.048   |
|                                               |              |            |            |                          |                 |                                               |                                               |        |                           |                                     |                                 | 28                               | 28      |
| Potential<br>Denitrificati<br>on              |              |            |            |                          |                 |                                               |                                               |        |                           |                                     |                                 | 1                                | -0.047  |
|                                               |              |            |            |                          |                 |                                               |                                               |        |                           |                                     |                                 |                                  | 0.814   |
|                                               |              |            |            |                          |                 |                                               |                                               |        |                           |                                     |                                 |                                  | 28      |
| ± OM                                          |              |            |            |                          |                 |                                               |                                               |        |                           |                                     |                                 |                                  | 1       |

\*\*-. Correlation is significant at the 0.01 level.

\*-. Correlation is significant at the 0.05 level.

Table S1. Spearman's rho correlation of all measured variables.

| Sample / Location | Texture     | Color      | Microbial Biomass C<br>$\mu\text{g C g}^{-1}$ | Microbial Respiration<br>$\mu\text{g C g}^{-1} \text{d}^{-1}$ | Microbial Biomass N<br>$\mu\text{g N g}^{-1}$ | Potential Net N Mineralization<br>$\mu\text{g N g}^{-1} \text{d}^{-1}$ | Potential Net Nitrification<br>$\mu\text{g N g}^{-1} \text{d}^{-1}$ | Denitrification Potential<br>$\mu\text{g N g}^{-1} \text{h}^{-1}$ |
|-------------------|-------------|------------|-----------------------------------------------|---------------------------------------------------------------|-----------------------------------------------|------------------------------------------------------------------------|---------------------------------------------------------------------|-------------------------------------------------------------------|
| 1N-GP             | packed clay | red        | 112.132                                       | 3.396                                                         | 0.465                                         | -0.046                                                                 | 0.000                                                               | 5.252                                                             |
| 2N-GP             | packed clay | red        | 102.732                                       | 4.104                                                         | 0.686                                         | -0.106                                                                 | 0.000                                                               | 0.948                                                             |
| 3N-GP             | packed clay | yellow     | 97.321                                        | 7.876                                                         | 1.302                                         | 0.084                                                                  | 0.036                                                               | 0.827                                                             |
| 4N-GP             | packed clay | yellow     | 75.851                                        | 2.906                                                         | 1.201                                         | 0.006                                                                  | 0.015                                                               | -0.389                                                            |
| 5N-GP             | packed clay | yellow     | 75.674                                        | 3.110                                                         | 0.770                                         | -0.026                                                                 | -0.010                                                              | 0.536                                                             |
| 6N-GP             | sandy clay  | white      | 62.501                                        | 3.011                                                         | 0.569                                         | -0.026                                                                 | 0.000                                                               | 0.598                                                             |
| 7N-GP             | packed clay | dark gray  | 173.448                                       | 9.057                                                         | 12.744                                        | 0.238                                                                  | 0.000                                                               | 0.747                                                             |
| 8N-GP             | packed clay | dark gray  | 212.542                                       | 5.364                                                         | 17.528                                        | 0.469                                                                  | 0.000                                                               | -0.286                                                            |
| 9N-GP             | packed clay | dark gray  | 151.138                                       | 5.291                                                         | 33.209                                        | 0.347                                                                  | 0.033                                                               | -0.243                                                            |
| 10N-GP            | packed clay | dark gray  | 134.974                                       | 3.863                                                         | 26.106                                        | 0.054                                                                  | 0.000                                                               | -0.079                                                            |
| 11N-GP            | packed clay | red        | 86.812                                        | 3.759                                                         | 5.889                                         | -0.368                                                                 | 0.007                                                               | -0.283                                                            |
| 12N-GP            | packed clay | light gray | 81.445                                        | 3.319                                                         | 1.927                                         | -0.004                                                                 | 0.000                                                               | 0.119                                                             |
| 13N-GP            | packed clay | dark gray  | 60.787                                        | 2.932                                                         | 14.337                                        | 0.041                                                                  | -0.014                                                              | -0.094                                                            |
| 14N-GP            | packed clay | light gray | 67.861                                        | 2.584                                                         | 3.454                                         | 0.149                                                                  | 0.000                                                               | 0.301                                                             |
| 1N-HHW            | packed clay | light gray | 69.060                                        | 3.671                                                         | 28.177                                        | 0.732                                                                  | 0.521                                                               | 1.034                                                             |
| 2N-HHW            | packed clay | light gray | 97.301                                        | 4.293                                                         | 15.866                                        | 0.571                                                                  | 0.414                                                               | 9.720                                                             |
| 3N-HHW            | packed clay | brown      | 189.972                                       | 5.411                                                         | 22.730                                        | 1.310                                                                  | 0.242                                                               | 0.273                                                             |
| 4N-HHW            | sandy clay  | light gray | 144.766                                       | 4.026                                                         | 1.473                                         | 0.010                                                                  | -0.017                                                              | 1.322                                                             |
| 5N-HHW            | sandy clay  | light gray | 98.937                                        | 5.312                                                         | 0.889                                         | 0.023                                                                  | -0.008                                                              | 0.394                                                             |
| 6N-HHW            | packed clay | light gray | 75.907                                        | 2.675                                                         | 4.390                                         | 0.047                                                                  | 0.002                                                               | 1.389                                                             |
| 7N-HHW            | packed clay | red        | 162.892                                       | 3.401                                                         | 0.631                                         | 0.029                                                                  | 0.004                                                               | -0.683                                                            |
| 8N-HHW            | packed clay | light gray | 167.119                                       | 4.589                                                         | 14.534                                        | 0.491                                                                  | 0.458                                                               | 16.005                                                            |
| 9N-HHW            | sandy clay  | white      | 62.253                                        | 4.381                                                         | 0.309                                         | 0.007                                                                  | -0.010                                                              | 0.136                                                             |
| 1N-CSP            | sandy clay  | brown      | 54.959                                        | 2.640                                                         | 3.212                                         | 0.045                                                                  | 0.024                                                               | 0.470                                                             |
| 2N-CSP            | sandy clay  | brown      | 87.658                                        | 2.899                                                         | 0.485                                         | 0.026                                                                  | 0.017                                                               | -0.028                                                            |
| 3N-CSP            | watery clay | brown      | 251.434                                       | 3.313                                                         | 0.295                                         | 0.009                                                                  | 0.022                                                               | 0.300                                                             |
| 4N-CSP            | watery clay | brown      | 143.976                                       | 4.595                                                         | 0.391                                         | -0.048                                                                 | -0.026                                                              | 0.304                                                             |
| 5N-CSP            | sandy clay  | red        | 77.525                                        | 2.971                                                         | 0.364                                         | -0.033                                                                 | -0.012                                                              | -0.070                                                            |

Table S2. Values of response variables measuring microbial biomass, respiration, and N cycle processes.

| Sample / Location | Texture     | Color      | Exchangeable<br>$\text{NO}_3^- \mu\text{g N g}^{-1}$ | Exchangeable<br>$\text{NH}_4^+ \mu\text{g N g}^{-1}$ | Total<br>Inorganic N<br>(TIN) $\mu\text{g N g}^{-1}$ | % OM   |
|-------------------|-------------|------------|------------------------------------------------------|------------------------------------------------------|------------------------------------------------------|--------|
| 1N-GP             | packed clay | red        | 0.231                                                | 1.184                                                | 1.415                                                | 5.090  |
| 2N-GP             | packed clay | red        | 0.240                                                | 1.469                                                | 1.709                                                | 4.590  |
| 3N-GP             | packed clay | yellow     | 0.124                                                | 0.841                                                | 0.966                                                | 2.208  |
| 4N-GP             | packed clay | yellow     | 0.246                                                | 0.560                                                | 0.806                                                | 3.013  |
| 5N-GP             | packed clay | yellow     | 0.245                                                | 0.828                                                | 1.073                                                | 4.398  |
| 6N-GP             | sandy clay  | white      | 0.203                                                | 0.547                                                | 0.750                                                | 0.547  |
| 7N-GP             | packed clay | dark gray  | 0.283                                                | 10.959                                               | 11.242                                               | 15.805 |
| 8N-GP             | packed clay | dark gray  | 0.269                                                | 14.686                                               | 14.955                                               | 11.391 |
| 9N-GP             | packed clay | dark gray  | 0.200                                                | 30.308                                               | 30.509                                               | 7.106  |
| 10N-GP            | packed clay | dark gray  | 0.274                                                | 24.531                                               | 24.805                                               | 6.301  |
| 11N-GP            | packed clay | red        | 0.026                                                | 8.398                                                | 8.424                                                | 5.833  |
| 12N-GP            | packed clay | light gray | 0.260                                                | 0.628                                                | 0.889                                                | 5.767  |
| 13N-GP            | packed clay | dark gray  | 0.305                                                | 14.932                                               | 15.237                                               | 4.749  |
| 14N-GP            | packed clay | light gray | 0.231                                                | 2.480                                                | 2.711                                                | 4.370  |
| 1N-HHW            | packed clay | light gray | 8.914                                                | 1.976                                                | 10.890                                               | 7.015  |
| 2N-HHW            | packed clay | light gray | 10.950                                               | 1.168                                                | 12.118                                               | 10.312 |
| 3N-HHW            | packed clay | brown      | 4.130                                                | 9.233                                                | 13.362                                               | 4.684  |
| 4N-HHW            | sandy clay  | light gray | 0.216                                                | 0.132                                                | 0.348                                                | 2.247  |
| 5N-HHW            | sandy clay  | light gray | 0.207                                                | 0.193                                                | 0.400                                                | 1.527  |
| 6N-HHW            | packed clay | light gray | 1.821                                                | 0.889                                                | 2.710                                                | 1.567  |
| 7N-HHW            | packed clay | red        | 0.157                                                | 0.103                                                | 0.261                                                | 5.298  |
| 8N-HHW            | packed clay | light gray | 10.083                                               | 0.597                                                | 10.680                                               | 5.861  |
| 9N-HHW            | sandy clay  | white      | 0.205                                                | 0.047                                                | 0.252                                                | 0.928  |
| 1N-CSP            | sandy clay  | brown      | 0.709                                                | 2.033                                                | 2.743                                                | 0.988  |
| 2N-CSP            | sandy clay  | brown      | 0.059                                                | 0.136                                                | 0.195                                                | 2.039  |
| 3N-CSP            | watery clay | brown      | 0.038                                                | 0.374                                                | 0.412                                                | 1.685  |
| 4N-CSP            | watery clay | brown      | 0.283                                                | 0.283                                                | 0.565                                                | 1.499  |
| 5N-CSP            | sandy clay  | red        | 0.335                                                | 0.224                                                | 0.559                                                | 0.440  |

Table S3. Values of response variables measuring N cycling content and organic matter.

| Sample / Location | Texture     | Color      | Total N<br>mg N kg <sup>-1</sup> | Total C<br>mg C kg <sup>-1</sup> | C/N<br>Ratio |
|-------------------|-------------|------------|----------------------------------|----------------------------------|--------------|
| 1N-GP             | packed clay | red        | 285                              | 2480                             | 9            |
| 2N-GP             | packed clay | red        | 295                              | 3440                             | 12           |
| 3N-GP             | packed clay | yellow     | 195                              | 715                              | 4            |
| 4N-GP             | packed clay | yellow     | 275                              | 620                              | 2            |
| 5N-GP             | packed clay | yellow     | 375                              | 830                              | 2            |
| 6N-GP             | sandy clay  | white      | 75                               | 595                              | 8            |
| 7N-GP             | packed clay | dark gray  | 1895                             | 54780                            | 29           |
| 8N-GP             | packed clay | dark gray  | 1235                             | 39160                            | 32           |
| 9N-GP             | packed clay | dark gray  | 1245                             | 39305                            | 32           |
| 10N-GP            | packed clay | dark gray  | 550                              | 5655                             | 10           |
| 11N-GP            | packed clay | red        | 340                              | 735                              | 2            |
| 12N-GP            | packed clay | light gray | 340                              | 760                              | 2            |
| 13N-GP            | packed clay | dark gray  | 380                              | 1080                             | 3            |
| 14N-GP            | packed clay | light gray | 335                              | 1425                             | 4            |
| 1N-HHW            | packed clay | light gray | 975                              | 17625                            | 18           |
| 2N-HHW            | packed clay | light gray | 1540                             | 33200                            | 22           |
| 3N-HHW            | packed clay | brown      | 500                              | 4150                             | 8            |
| 4N-HHW            | sandy clay  | light gray | 440                              | 4565                             | 10           |
| 5N-HHW            | sandy clay  | light gray | 85                               | 875                              | 10           |
| 6N-HHW            | packed clay | light gray | 280                              | 3130                             | 11           |
| 7N-HHW            | packed clay | red        | 205                              | 1160                             | 6            |
| 8N-HHW            | packed clay | light gray | 710                              | 8145                             | 12           |
| 9N-HHW            | sandy clay  | white      | 100                              | 705                              | 7            |
| 1N-CSP            | sandy clay  | brown      | 120                              | 1580                             | 13           |
| 2N-CSP            | sandy clay  | brown      | 140                              | 995                              | 7            |
| 3N-CSP            | watery clay | brown      | 245                              | 1445                             | 6            |
| 4N-CSP            | watery clay | brown      | 405                              | 655                              | 2            |
| 5N-CSP            | sandy clay  | red        | 570                              | 355                              | 1            |

Table S4. Values for total N and C content and their ratio.
